# 1 Stochastic Analysis Probes the Role 2 of the Chaperone Hfq in *E. coli* Sugar 3 Shock Response

4 David M. Bianchi<sup>1,2</sup>, Troy A. Brier<sup>1,2</sup>, Anustup Poddar<sup>2,3,4</sup>, Muhammad S. Azam<sup>5,§</sup>,  
5 Carin K. Vanderpool<sup>5</sup>, Taekjip Ha<sup>2,3,4</sup>, Zaida Luthey-Schulten<sup>1,2,\*</sup>

\*For correspondence:  
[zan@illinois.edu](mailto:zan@illinois.edu)

Present address: <sup>§</sup>Department of  
Biochemistry and Molecular  
Biology, University of Chicago,  
Chicago, IL, USA

6 <sup>1</sup>Department of Chemistry, University of Illinois at Urbana-Champaign, Urbana, IL, USA;  
7 <sup>2</sup>Center for the Physics of Living Cells, University of Illinois at Urbana-Champaign, Urbana,  
8 IL, USA; <sup>3</sup>Department of Biophysics, Johns Hopkins University, Baltimore, MD, USA;  
9 <sup>4</sup>Howard Hughes Medical Institute, USA; <sup>5</sup>Department of Microbiology, University of  
10 Illinois at Urbana-Champaign, Urbana, IL, USA

11  
12 **Abstract** Small RNAs (sRNAs) play a crucial role in the regulation of bacterial gene expression by  
13 silencing the translation of target mRNAs. SgrS is an sRNA that relieves glucose–phosphate stress,  
14 or “sugar shock” in *E. coli*. The power of single cell measurements is their ability to obtain  
15 population level statistics that illustrate cell-to-cell variation. Here, we utilize single molecule  
16 super-resolution microscopy in single *E. coli* cells coupled with stochastic modeling to analyze  
17 glucose–phosphate stress regulation by SgrS. We present a kinetic model that captures the  
18 combined effects of transcriptional regulation, gene replication and chaperone mediated RNA  
19 silencing in the SgrS regulatory network. This more complete kinetic description, simulated  
20 stochastically, recapitulates experimentally observed cellular heterogeneity and is used to describe  
21 the dynamics of SgrS stabilization by the chaperone protein Hfq.

## 22 23 Introduction

24 The ability of living cells to modulate their gene expression in response to changing environmental  
25 conditions is critical to their growth and continued development. Many bacteria use the phospho-  
26 enolpyruvate phosphotransferase (PTS) system to transport and phosphorylate incoming sugars  
27 to prepare them for subsequent glycolytic metabolism. The uptake of phosphosugars must be  
28 balanced with their breakdown in order to prevent metabolic stress. In *E. coli*, a stress response  
29 induced by unbalanced glucose–phosphate transport and metabolism or “sugar shock”, is referred  
30 to as glucose–phosphate stress response. A primary activity of this stress response is RNA silencing  
31 of *ptsG*, a gene coding for the glucose transport protein of the same name (also known as EII<sub>CBGlc</sub>  
32 in *E. coli*), by the small RNA (sRNA) SgrS. Small RNAs are usually non-coding RNA molecules that  
33 act by base pairing with target messengers to regulate translation or mRNA stability and have  
34 been observed across all domains of life (*Babski et al., 2014*). *sgrS* is upregulated by a transcrip-  
35 tional activator (SgrR) when the cell is under a state of glucose–phosphate stress. SgrS regulates  
36 *ptsG* post-transcriptionally by a mechanism where SgrS binds to *ptsG* messenger RNA (mRNA) and  
37 prevents its translation to protein by blocking access of the ribosome to the mRNA (*Vanderpool and*  
38 *Gottesman, 2004; Maki et al., 2010*). This also enhances the co-degradation of *ptsG* mRNA and SgrS  
39 via enzymes responsible for the removal of bulk RNA such as ribonuclease E (RNase E) (*Kawamoto*  
40 *et al., 2006; Maki et al., 2010*). The co-degradation reduces the number of PtsG sugar transporter

41 proteins that are produced and thus reduces the impact of glucose-phosphate stress, since fewer  
42 transport proteins are available to bring sugar into the cell.

43 SgrS and *ptsG* mRNA associate via complementary base pairing that occludes the ribosome  
44 binding site on the mRNA. Recently, this mechanism has been analyzed in conjunction with binding  
45 of the Sm-like chaperone protein Hfq to SgrS, which stabilizes the sRNA, and facilitates the inter-  
46 action between the sRNA and mRNA (*Ishikawa et al., 2012*). Hfq also promotes SgrS-dependent  
47 regulation of other targets involved in sugar shock such as *manXYZ*, and *yigL* in *E. coli*. In this study,  
48 we focus only on the primary regulatory target *ptsG* and do not consider the other targets of SgrS  
49 regulon, which are described in *Bobrovskyy et al. (2019)*.

50 Previous experimental and theoretical work (*Jones et al., 2014; Peterson et al., 2015*) has demon-  
51 strated the necessity of accounting for gene replication over the course of the cell cycle in order  
52 to capture the population variation observed in messenger RNA abundance. The additional noise  
53 emanating from transcription at multiple gene loci manifests itself in observed broad mRNA copy  
54 number distributions in a population of cells. This work also demonstrated that including the  
55 effect of gene regulation by transcription factors can be critical in order to appropriately describe  
56 stochastic dynamics. The effect of transcriptional regulation is apparent in the SgrS-*ptsG* mRNA sys-  
57 tem, where the expression of SgrS is maintained by the regulator SgrR, which activates *sgrS* and  
58 autorepresses its own expression during glucose-phosphate stress conditions (*Vanderpool and*  
59 *Gottesman, 2004, 2007b*).

60 Recently, *Fei et al. (2015)* presented a deterministic kinetic model of the SgrS mediated regulation  
61 of *ptsG* mRNA in *E. coli*. Using single-molecule fluorescence experiments (smFISH and STORM), SgrS  
62 and *ptsG* mRNA copy numbers in cells were measured, which produced distributions of RNA at  
63 various time points after the induction of sugar stress across a population of fast-growing *E. coli*.  
64 However, it is important to note that both the *ptsG* mRNA and the SgrS regulating it are present in  
65 low copy number (a few to tens of particles) and therefore exhibit intrinsically noisy behavior in  
66 both their gene expression and regulatory behaviors. For this reason it is most appropriate to treat  
67 the regulatory network via stochastic simulation in order to quantify the variation that is observed  
68 across a population of cells, which has been demonstrated previously (*Elowitz et al., 2002; Raser,*  
69 *2005; Earnest et al., 2018*).

70 Here, we have developed a stochastic model, to our knowledge the first of its kind for RNA  
71 silencing, that captures the mRNA and sRNA distributions observed in a population of hundreds  
72 of *E. coli* cells. The stochastic model additionally incorporates the following features that extend  
73 the platform given by *Fei et al. (2015)*: (1) accounting for gene replication, (2) transcriptional gene  
74 regulation of *sgrS* by its activator SgrR and (3) explicit representation of the SgrS stabilization via the  
75 Hfq chaperone protein. This model robustly describes experimentally observed RNA distributions,  
76 closely matching regulatory dynamics from immediately after induction until a steady state is  
77 reached 20 minutes later. We also utilize this model to analyze the effects of the size of the pool  
78 of Hfq chaperone protein available, the rate of Hfq binding to SgrS to stabilize it and enhance its  
79 binding to the target, *ptsG* mRNA, and the effect of an SgrS point mutation in the SgrS-Hfq binding  
80 region on the regulatory network.

## 81 Model

82 The previous kinetic model for SgrS regulation of *ptsG* mRNA (*Fei et al., 2015*) utilized simple mass-  
83 action kinetics to describe the target search process and modeled gene expression as a constitutive  
84 process, with RNA species originating from a single gene copy. Despite its simplicity, this model  
85 captures average regulatory network behavior and also gives insight into many of the parameters  
86 required for the more descriptive stochastic model that is the focus of this work. For example,  
87 since a binding rate for SgrS to *ptsG* mRNA was established in *Fei et al. (2015)* we are now able to  
88 complexify the model by the addition of the chaperone protein Hfq, which allowed us to predict (by  
89 fitting to the experimental data) the size of the pool of Hfq available to stabilize SgrS and the rate at  
90 which it binds the sRNA.

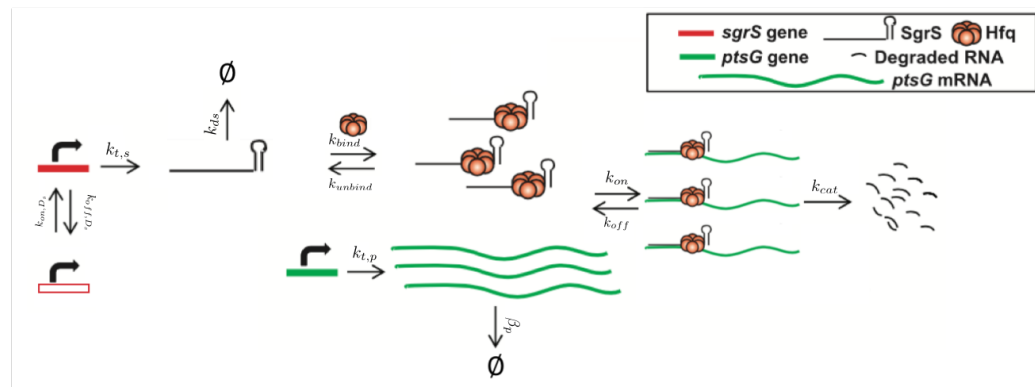

**Figure 1.** Schematic of the kinetic model as described in the text. The RNA species are transcribed from a sampled genome state with *sgrS* capable of switching between an on and off state. Explicitly represented Hfq can bind and unbind with SgrS, and then the Hfq-SgrS complex binds (and potentially unbinds) with *ptsG* mRNA. All degradation events are carried out by the enzyme RNase E. See **Figure 4** for the kinetic equations described above.

91 The kinetic model was implemented and solved stochastically as a well-mixed Chemical Master  
 92 Equation (CME) in the Lattice Microbes (LM) simulation software suite (Roberts *et al.*, 2013; Hallock  
 93 *et al.*, 2014; Hallock and Luthey-Schulten, 2016; Peterson *et al.*, 2013). The corresponding rate  
 94 constants (Table 1) were adapted from the kinetic model described above (Figure 1). One important  
 95 feature added to the model is the explicit presence of the chaperone protein Hfq, which has been  
 96 shown to both stabilize SgrS (substantially increasing its half-life) and facilitate the association  
 97 of SgrS to *ptsG* mRNA (Hopkins *et al.*, 2011; Wagner, 2013; Vanderpool and Gottesman, 2004;  
 98 Santiago-Frangos and Woodson, 2018). In order to capture the cell-to-cell heterogeneity due to the  
 99 small number of particles (e.g., gene copies) involved in transcription, it is critical to account for  
 100 transcriptional regulation of the genes involved in the glucose-phosphate stress response. For this  
 101 reason, we include the transcriptional activation of *sgrS* by the transcription factor SgrR, which has  
 102 been shown to upregulate expression in the presence of  $\alpha$ MG (Vanderpool and Gottesman, 2007a,  
 103 2004). Regulation of *ptsG* by the transcriptional repressor Mlc was not included in the model since  
 104 repression is relieved in the presence of glucoside sugars. With  $\alpha$ MG present, Mlc is sequestered at  
 105 the membrane by binding the E1IB subunit of the PtsG transporter protein complex (Lee, 2000; Seitz  
 106 *et al.*, 2003; Nam *et al.*, 2008), relieving repression and resulting in high levels of *ptsG* transcriptional  
 107 activity (Balasubramanian and Vanderpool, 2013). Since the decay time of PtsG proteins is expected  
 108 to be approximately on the order of eight hours (Maier *et al.*, 2011), much longer than the timescale  
 109 of mRNA decay, Mlc repressors are likely still sequestered by the transporters at the membrane  
 110 and have little effect on the SgrS regulatory process. Rates for the association of the Hfq-SgrS  
 111 complex to *ptsG* mRNA ( $k_{on}$ ) and the dissociation of the Hfq-SgrS-*ptsG* mRNA complex ( $k_{off}$ ) were  
 112 obtained from Fei *et al.* (2015), which did not include Hfq explicitly but provides the corresponding  
 113 association and dissociation reaction rates. The value for the co-degradation rate of SgrS and *ptsG*  
 114 mRNA from the Hfq-SgrS-*ptsG* mRNA complex by RNase E ( $k_{cat}$ ) is also obtained from Fei *et al.*  
 115 (2015) (see Section 'Methods and Materials').

### 116 Calculation of Gene Copy Number

117 Finally, and critically, in order to appropriately capture regulatory effects on gene expression  
 118 of SgrS and *ptsG* mRNA, it is important to account for gene duplication, as we have previously  
 119 shown (Peterson *et al.*, 2015). As illustrated by Jones *et al.* (2014) since the approximate time to  
 120 replicate the *E. coli* genome (approximately 40 minutes) (Cooper and Helmstetter, 1968) is longer  
 121 than the fast-growing *E. coli* cell division time of 20 minutes (or the 35 minutes observed in our  
 122 experiments), the cell has nested replication forks that are already replicating the genomes of  
 123 daughter and granddaughter cells prior to cell division. In particular, genes close to the origin of

124 replication are likely to have multiple copies present over much of the cell cycle. This phenomenon  
125 has been shown previously for genes near the origin in *E. coli* by both isotopic labeling of nucleotides  
126 and imaging of fluorescent chromosome markers (Cooper and Helmstetter, 1968; Youngren et al.,  
127 2014). Due to the position of *sgrS* (only 6° away along the circular chromosome) very near to  
128 the origin of replication, it is likely that multiple gene copies are accessible for transcription over  
129 the course of the cell cycle. About half-way between the origin and terminus of replication (at  
130 approximately 90°) *ptsG* is also likely to have multiple gene copies present at some point over the  
131 course of the cell cycle, although at lower copy number than *sgrS*. Figure 2 depicts the two genes  
132 and their location along the circular *E. coli* genome.

133 The experimentally measured cells were unsynchronized and should have multiple replication  
134 forks present over the course of the 20 minutes post-induction, our measurement window. To  
135 account for gene duplication effects in the population of unsynchronized cells, we sample the  
136 percentage of the cellular population in either a low or high gene state, which corresponds to the  
137 expected distribution of the number of genes present over the course of the cell cycle after induction.  
138 In this way, we effectively flip a coin to decide whether a simulation replicate corresponding to  
139 an individual experimentally imaged *E. coli* cell has 2 copies (low gene state) of or 4 copies (high  
140 gene state) of *sgrS* and similarly 1 or 2 copies of *ptsG*. This allows us to account for the effect of  
141 gene duplication in generating mRNA noise over the heterogeneous population of hundreds of  
142 *E. coli* cells that were observed experimentally. We assume that all gene copies are transcribed  
143 independently from one another and at the same rate, a notion that Wang et al. (2019) has recently  
144 examined in *E. coli* under various growth conditions. Under similar growth conditions to ours (MOPS  
145 glucose-based medium with a doubling time of 35 minutes, (see Section 'Methods and Materials')),  
146 the data from Wang et al. (2019) suggest that transcription does appear to be independent and  
147 uncorrelated between copies of the same gene (Wang et al., 2019).

148 Figure 3 illustrates the reasoning for the specific choices of high and low state gene copy  
149 numbers for *ptsG* and *sgrS* in an *E. coli* cell growing faster than the expected time necessary for  
150 replication (approximately 40 minutes, compared to an experimentally observed generation time of  
151 approximately 35 minutes) (Cooper and Helmstetter, 1968; Youngren et al., 2014).

152 Stochastic simulations were performed by sampling the CME for the model given in Figure 1  
153 with the widely used Gillespie Direct Method of the Stochastic Simulation Algorithm (SSA), which  
154 is available through the publicly available Lattice Microbes (LM) software suite (version 2.3  
155 was used) and its python interface pyLM (Roberts et al., 2013; Hallock et al., 2014; Hallock and  
156 Luthey-Schulten, 2016; Peterson et al., 2013). We ran 2000 replicate simulations for 25 minutes after  
157  $\alpha$ MG induction of glucose-phosphate stress in order to match the corresponding 20-minute  
158 smFISH-STORM experiments. Initial conditions for basal SgrS (1-3 copies) and *ptsG* mRNA (30-  
159 40 copies) copy number were sampled from the experimentally measured distributions and rounded  
160 to the nearest integer particle number. Simulations were computed on a local cluster containing  
161 AMD Opteron Interlagos cores.

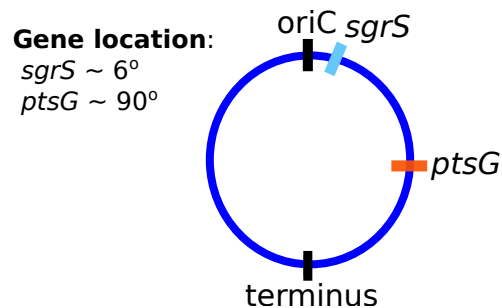

162 **Figure 2.** The gene location for SgrS and *ptsG*  
163 mRNA relative to the origin of replication (*oriC*)  
164 are shown on the circular chromosome of the *E.*  
165 *coli* cells used for this study. As it is closer to the  
166 origin of replication *sgrS* (cyan) is likely to be  
167 present in higher gene copy number than *ptsG* (in  
168 orange), which is farther away from the *oriC* as  
169 shown.

## 171 SgrS Regulatory Network Kinetic Model

172 The kinetic model describing the reactions characterizing the *E. coli* glucose-phosphate response  
173 network by the small RNA SgrS is given in Figure 4. Simulation files are available in Jupyter Notebook

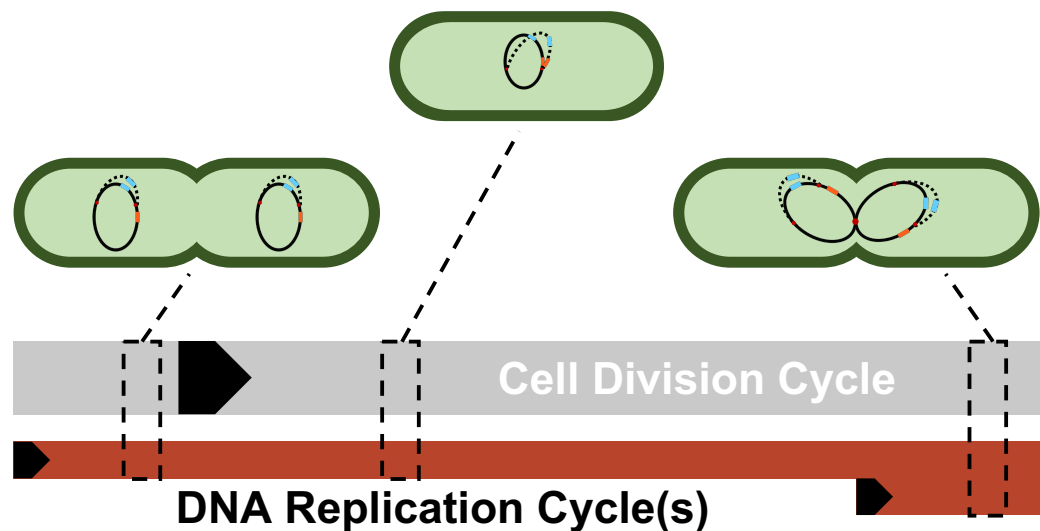

**Figure 3.** A simplified depiction of possible cellular states throughout a single DNA replication cycle. Each cell shows a snapshot of the gene state of a cell given its progression through the DNA replication and cell division cycle. Due to the difference in lengths of the cell division cycle (~35 mins) and DNA replication cycle (~40 mins), DNA replication and cell division are not completely in sync. Multiple replication forks (red dots) can form on the genome in order to ensure DNA is duplicated properly in these fast-growing cells. As a result, genes closer to the origin such as *sgrS* (blue) are duplicated in the same timeframe that replication is initiated (resulting in 2 or 4 gene copies), while genes closer to the terminus such as *ptsG* (orange) are replicated in the C period, the period when a majority of DNA is duplicated (resulting in 1 or 2 gene copies). The black arrows denote the start of a cycle.

174 format to be simulated via the Lattice Microbes (LM) Software Package at [Add link to jupyter](#)  
175 **notebook.**

## 176 Results

177 **Figure 5** demonstrates the ability of our newly developed kinetic model to capture the average  
178 cellular copy number of *SgrS* and *ptsG* mRNA over the course of the 20 minute period post-induction.  
179 The overlap of the interquartile range of both the experimental and simulated cellular populations  
180 demonstrates the agreement over a variety of cells (at different gene states (*i.e.* high/low copy  
181 number), and RNA expression levels).

182 The ability of our improved kinetic model to capture population-level statistics of single cell copy  
183 number distributions of *SgrS* and *ptsG* mRNA is demonstrated in **Figure 6**. Kernel Density Estimates  
184 (KDE), which are used to estimate the probability densities of distributions of approximately 100–  
185 200 experimentally measured cells and 2000 simulated cells are displayed, along with dashed  
186 vertical lines giving the average RNA copy numbers observed. KDEs were utilized to provide a  
187 reasonable comparison to the experimental values despite the fact that there were a relatively low  
188 number of cells measured at each time point (approximately 100–200) compared to the number  
189 of replicates required for appropriate stochastic simulation (2000). The distributions obtained  
190 from both experiment and the kinetic model show strong agreement (especially in the case of  
191 *ptsG* mRNA), which can be seen quantitatively by the starred line showing the Kulback–Leibler  
192 Divergence (KL Divergence) in **Figure 7**. The KL Divergence (**Equation 2**), which was minimized to fit  
193 to experimental RNA distributions over all time points, is a statistical measure used to characterize  
194 the difference between a probability distribution (the KDE of simulated cells) and a reference  
195 distribution (the KDE of experimentally measured cells).

196 The parameters obtained from the fitting process give some insight into the role of stabilization by  
197 Hfq in the *SgrS-ptsG* mRNA target search process and the role of transcriptional regulation



198 by SgrR in the regulatory network. The pseudo first order rate of Hfq binding to SgrS ( $k_{bind}$ ) is  
 199  $0.063\ s^{-1}$ , while the degradation rate of SgrS ( $k_{ds}$ ), obtained from  $\Delta hfq$  strain experiments (described  
 200 in Section 'Methods and Materials'), is  $0.022\ s^{-1}$ . The available Hfq pool size of 250 predicted  
 201 by fitting to the kinetic model seems reasonable in that average proteomics values have been  
 202 found to be on the order 1500 (Taniguchi et al., 2010; Santiago-Frangos and Woodson, 2018) and  
 203 unique sRNAs have been shown to be bound to 10 to 1000 copies of Hfq in *E. coli* (Melamed et al.,  
 204 2020) (Appendix 1–Effects of Varying Available Hfq Pool Size). Additionally, the aforementioned  
 205 SgrS-Hfq binding rate  $k_{bind}$  corresponds well to experimentally measured *in vitro* values for sRNA-  
 206 Hfq binding for sRNA of its approximate size (Santiago-Frangos and Woodson, 2018; Fender et al.,  
 207 2010; Hopkins et al., 2011). If the pseudo first order rate for  $k_{bind}$  reported in Table 1 is converted  
 208 to a bulk second order rate by incorporating the Hfq concentration at the predicted available  
 209 pool size of 250, we obtain a binding rate of  $1.5 \times 10^5\ M^{-1}\ s^{-1}$ . This value agrees better with the  
 210 reported value of approximately (Santiago-Frangos and Woodson, 2018)  $10^6\ M^{-1}\ s^{-1}$  for long RNAs  
 211 binding to Hfq (Fender et al., 2010; Lease and Woodson, 2004) than  $10^8\ M^{-1}\ s^{-1}$  reported for short,  
 212 unstructured RNAs binding to Hfq (Hopkins et al., 2011). Since SgrS is a relatively long sRNA (sRNA  
 213 have typically been found to be between 37–300 nt (Wang et al., 2015a)) with a length of 227  
 214 nucleotides, the slow sRNA-Hfq binding rate obtained by fitting seems appropriate. This type  
 215 of slow sRNA association process has been suggested to be characterized by RNA restructuring  
 216 (by which Hfq remodels sRNA regions in order to make its secondary structure more accessible  
 217 for target mRNA base pairing) (Antal et al., 2004; Bordeau and Felden, 2014; Soper et al., 2011;  
 218 Soper and Woodson, 2008), which has been proposed to occur for SgrS (Maki et al., 2010).  $k_{bind}$  is  
 219 also much greater than the Hfq-SgrS unbinding rate ( $k_{unbind}$ ) of  $0.0018\ s^{-1}$  which was obtained from  
 220 fitting to the degradation rate of SgrS in a cell where Hfq was expressed (distinct from the  $\Delta hfq$

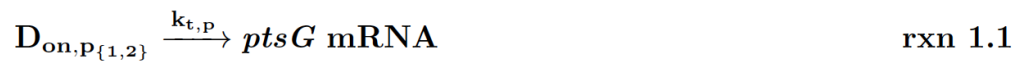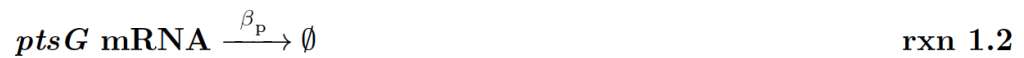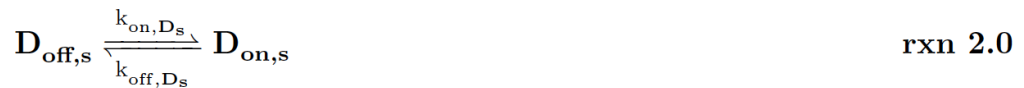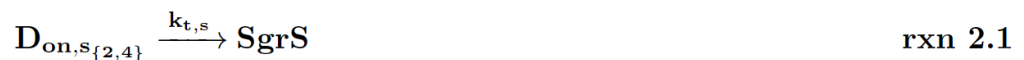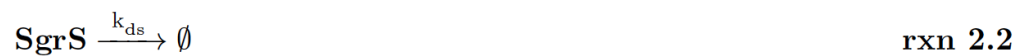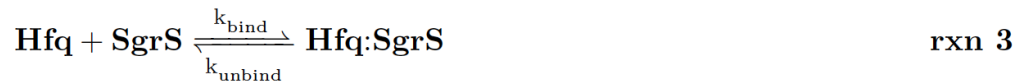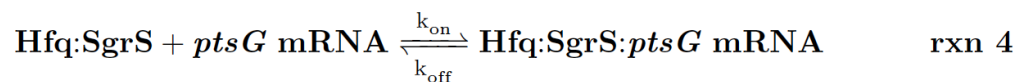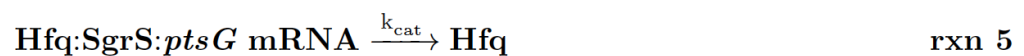

**Figure 4.** Kinetic Equations of the SgrS regulatory network.  $D_{on,p_{1,2}}$  refers to the gene (or DNA) for *ptsG* in 1 (low state) or 2 (high state) copies and  $D_{on,s_{2,4}}$  corresponds to the gene for *sgrS* in 2 (low state) or 4 (high state) copies.  $D_{on,s}$  corresponds to *sgrS* when it is in the "ON" state due to activated or solute bound transcriptional activator SgrR being bound (Vanderpool and Gottesman, 2007b).  $k_{ds}$  corresponds to the experimentally measured degradation rate of SgrS when cellular Hfq is not present and  $k_{unbind}$  corresponds to the experimentally measured degradation of SgrS when Hfq was present.

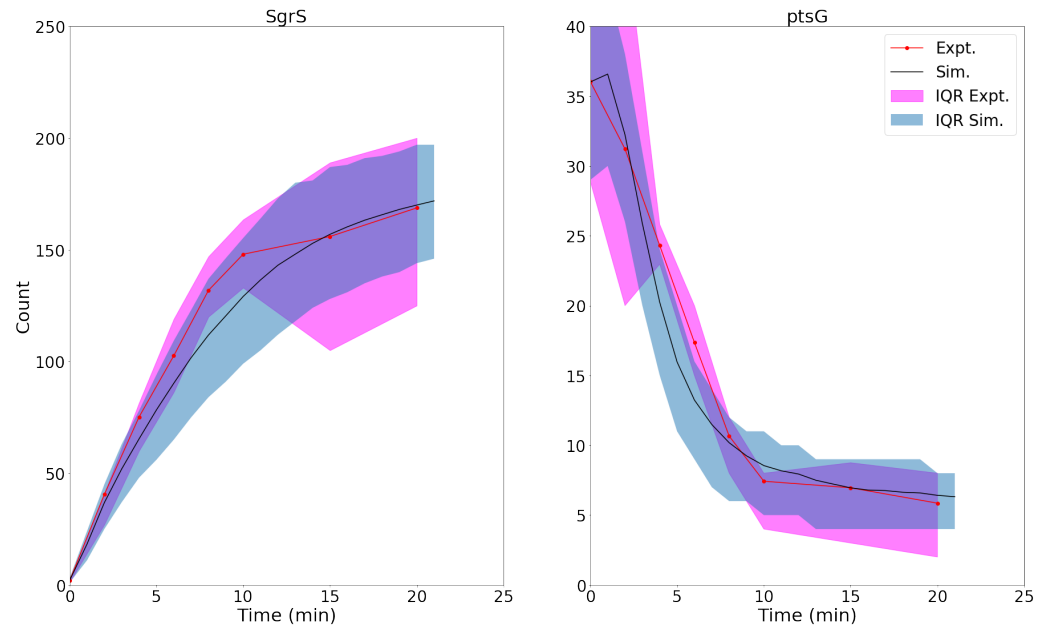

**Figure 5.** Average time trace and interquartile range (IQR) of labeled *SgrS* (left) and *ptsG* mRNA (right) from both 85–169 cells from smFISH experiments (red) and 2000 replicates from kinetic model simulations (blue). The kinetic model shows strong agreement, especially at long times (10-20 minutes) after induction and captures overall response behavior. An available pool of 250 Hfq and the kinetic parameters given in [Table 1](#) were utilized. Results considering both lower and higher available Hfq pools are discussed in [Appendix 1-Figure 1](#).

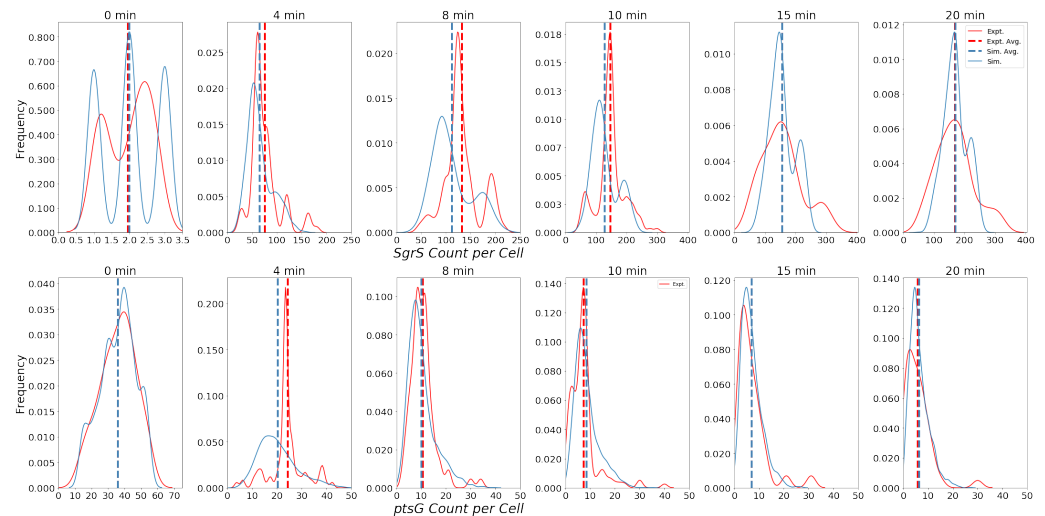

**Figure 6.** Distributions of Wild-Type *SgrS* (top) and *ptsG* mRNA (bottom) at various time points from 0 to 20 minutes post-induction. Data from smFISH-STORM experiments (red, 100–200 cells per time point) and stochastic simulations (blue, 2000 cells per time point) are shown as kernel density estimates. The effect of number of cell replicates is studied further in [Appendix 1-Figure 3](#). Average copy number at each time point is displayed with dashed vertical lines.

**Table 1.** The list of parameters used for the kinetic model. The % in each gene state refers to percentage of cells with the gene being in a low or high gene copy state as described in . *a*)  $k_{bind}$  is a Pseudo first order rate accounting for the average expected pool size of Hfq participating in SgrS stabilization and enhancement (250). When converted to the corresponding bulk second order rate with 250 Hfq present  $k_{bind}$  agrees well with the range of Hfq binding rates measured for other sRNA reviewed in (*Santiago-Frangos and Woodson, 2018*) and discussed further in Results

| Parameter                                 | Value                | Unit                | Source                          |
|-------------------------------------------|----------------------|---------------------|---------------------------------|
| $k_{t,p}$                                 | 0.12                 | $s^{-1}$            | Experimentally Measured         |
| $\beta_p$                                 | $3.7 \times 10^{-3}$ | $s^{-1}$            | Experimentally Measured         |
| $k_{on,D_s}$                              | $3.0 \times 10^{-2}$ | $s^{-1}$            | fit                             |
| $k_{off,D_s}$                             | $9.5 \times 10^{-3}$ | $s^{-1}$            | fit                             |
| $k_{t,s}$                                 | 0.33                 | $s^{-1}$            | fit                             |
| $k_{ds}$                                  | 0.022                | $s^{-1}$            | $\Delta hfq$ decay rate of SgrS |
| $k_{bind}$                                | 0.063 <sup>a</sup>   | $s^{-1}$            | fit                             |
| $k_{unbind}$                              | 0.0018               | $s^{-1}$            | SgrS decay rate                 |
| $k_{on}$                                  | $3.1 \times 10^{-4}$ | $molec^{-1} s^{-1}$ | <i>Fei et al. (2015)</i>        |
| $k_{off}$                                 | 0.22                 | $s^{-1}$            | <i>Fei et al. (2015)</i>        |
| $k_{cat}$                                 | 0.3                  | $s^{-1}$            | <i>Fei et al. (2015)</i>        |
| % high, low gene state <i>sgrS</i>        | 25, 75               | %                   | fit                             |
| % high, low gene state <i>ptsG</i>        | 46, 54               | %                   | fit                             |
| Hfq pool size (available to SgrS Regulon) | 250                  | <i>molec</i>        | fit                             |

221 rate) by assuming that Hfq–SgrS unbinding is the rate-limiting step in the degradation of free SgrS  
 222 represented in **Figure 4** Reaction 2.2. These results seem reasonable in that SgrS should associate  
 223 with Hfq at a rate comparable to its degradation as well as that SgrS–Hfq binding should happen  
 224 at a significantly higher rate than their dissociation for sRNA chaperone stabilization by Hfq to be  
 225 effective.

226 The kinetic values for transcriptional regulation by the activator SgrR also seem reasonable with  
 227 a  $k_{on,D_s}$  of  $3.0 \times 10^{-2} s^{-1}$  and a  $k_{off,D_s}$  of  $9.5 \times 10^{-3} s^{-1}$ . The gene switching parameters correspond to  
 228 *sgrS* activation via SgrR binding occurring approximately 30 seconds after initiation of induction,  
 229 with all *sgrS* genes assumed to start in the “OFF” state (the effect of starting genes in the “OFF”  
 230 versus the “ON” state is given in **Appendix 1–Figure 2**). This seems reasonable since SgrS sRNA  
 231 moves from a basal level of a few copies to greater than 40 copies on average in two minutes time  
 232 (**Figure 5**). The fact that  $k_{on,D_s}$  is 3 times greater than  $k_{off,D_s}$  means that activation happens more  
 233 frequently than deactivation from unbinding of SgrR. The relative behavior is somewhat expected  
 234 as sugar shock has been induced and SgrR is believed to be transformed to its active conformation  
 235 as a transcriptional factor for *sgrS* by binding to a small molecule at its C-terminus (*Vanderpool*  
 236 *and Gottesman, 2004, 2007b*). While the available evidence suggests that the activity of SgrR due to  
 237 solute binding rather than *sgrR* expression affects activation of *sgrS*, it has been demonstrated that  
 238 SgrR is negatively autoregulated (*Vanderpool and Gottesman, 2007b*) which may lead to a ceiling  
 239 on the level of *sgrS* activation that can occur even after glucose-phosphate stress is fully induced.  
 240 Thus, we incorporate constant rates of  $k_{on,D_s}$  and  $k_{off,D_s}$  for *sgrS* activation in our model, instead of a  
 241 time variant rate constant for either parameter.

### 242 **Comparison of Goodness of Fit Based on Model Complexity**

243 To illustrate the improvement of the kinetic model to describe cellular populations, we compare  
 244 simulation results sequentially as each level of complexity (*i.e.*, transcriptional regulation by SgrR,  
 245 gene replication, and stabilization by the chaperone protein Hfq) is added to the original reduced  
 246 model presented in *Fei et al. (2015)*. **Figure 7** demonstrates the improvement in descriptiveness at  
 247 both an average and population level with progression to a more fine-grained kinetic model. The



248 relative error of the average copy number of SgrS and *ptsG* mRNA gives the capability of the model  
249 to reproduce experiments on an average level, while the Kulback–Leibler Divergence (KL Divergence)  
250 shows the agreement between the experimentally observed and simulation distributions of RNA  
251 copy numbers at a series of times from 0 to 20 minutes post induction.

252 The Relative Error used to illustrate the agreement between the experimentally measured  
253 average RNA copy number and the theoretical value is given by:

$$\eta = \left| \frac{Exp_{avg} - Sim_{avg}}{Exp_{avg}} \right| \quad (1)$$

254 The KL Divergence used to compare agreement between experimental and simulated distribu-  
255 tions is given by:

$$D_{KL}(P||Q) = \sum_i P(i) \log \frac{P(i)}{Q(i)} \quad (2)$$

256 where P(i) is the continuous probability distribution given by the Gaussian KDE of the experi-  
257 mental copy number distribution of RNA (SgrS or *ptsG* mRNA) and Q(i) is the analogous simulated  
258 RNA copy number distribution.

259 It is clear that the decrease in the KL Divergence (**Equation 2**), describing the ability of the kinetic  
260 model to accurately describe heterogeneity, is most substantial in the final model presented in this  
261 work (star markers). Accounting for transcriptional regulation by SgrR, ongoing gene replication,  
262 and the stabilizing effect of Hfq allows for a more faithful description of the noise observed in a  
263 cellular population in the process of sugar shock response.

## 264 **Characterizing the Effects of SgrS Point Mutation on Association to Hfq and *ptsG* mRNA**

265 The stochastic model we have presented can also be utilized to characterize the effects of *sgrS* point  
266 mutations on the regulatory network as a whole. The polyU tail region of *sgrS* comprising the final 8  
267 residues of the 5' end (all of which are uridine in the sRNA) has previously been shown to be an  
268 important site for Hfq recruitment (*Otaka et al., 2011*). When the polyU tail is truncated or similarly  
269 disrupted, there is a noticeable decrease in SgrS regulatory efficiency. With this in mind, we used  
270 the previously defined kinetic model (See **Figure 4**) to characterize the effect of a point mutation  
271 resulting in a U to G change in SgrS at position 224 (in the polyU tail region, hereafter referred  
272 to as U224G) of the sRNA on regulatory kinetics. This point mutation is well downstream of the  
273 seed region (nucleotides 168–187) where SgrS-*ptsG* mRNA base pairing occurs (*Maki et al., 2010*;  
274 *Bobrovskyy and Vanderpool, 2014*) so it should not directly interfere with sRNA-mRNA interactions.  
275 It is also important to consider the possible structural effects arising from polyU tail mutation.  
276 Through *in silico* folding (**Appendix 1-Figure 5**) with the RNA structure prediction tool mFold (*Zuker,*  
277 *2003*), we confirmed that the stability of the U224G with a  $\Delta G$  of  $-17.60 \text{ kcal/mol}$  is unchanged from  
278 the predicted wild-type value of  $-17.60 \text{ kcal/mol}$ , indicating that sRNA structure is conserved and  
279 the measured wild-type  $\Delta Hfq$  degradation rate (see Section 'Methods and Materials') is appropriate  
280 for use in fitting the U224G mutant data (as a rate for **Figure 1, rxn 2.2**).

281 We then fit to the experimentally measured SgrS and *ptsG* mRNA distributions using the previ-  
282 ously determined kinetic model. A robust fit describing both average behavior as well as population  
283 level variation (**Figure 8, Appendix 1-Figure 4**) was achieved primarily by modulating the rates of  
284 SgrS to Hfq binding and unbinding and the *ptsG* mRNA annealing rates  $k_{on}$  and  $k_{off}$  (which were  
285 also free parameters in this treatment) to a much lesser extent, which further demonstrates the  
286 role of the polyU tail in Hfq chaperone recruitment.

287 The changes in the kinetic parameters of the model used to fit mutant U224G relative to the  
288 wild-type cells (WT) illustrate the effects of this mutation on SgrS-Hfq association, relative to the  
289 subsequent annealing of SgrS to its target *ptsG* mRNA (**Table 2**).

290 The 48% decrease in the SgrS-Hfq binding rate  $k_{bind}$  and 66% increase in the unbinding rate of  
291 the sRNA and chaperone complex  $k_{unbind}$  highlight the effects of polyU tail disruption, and support

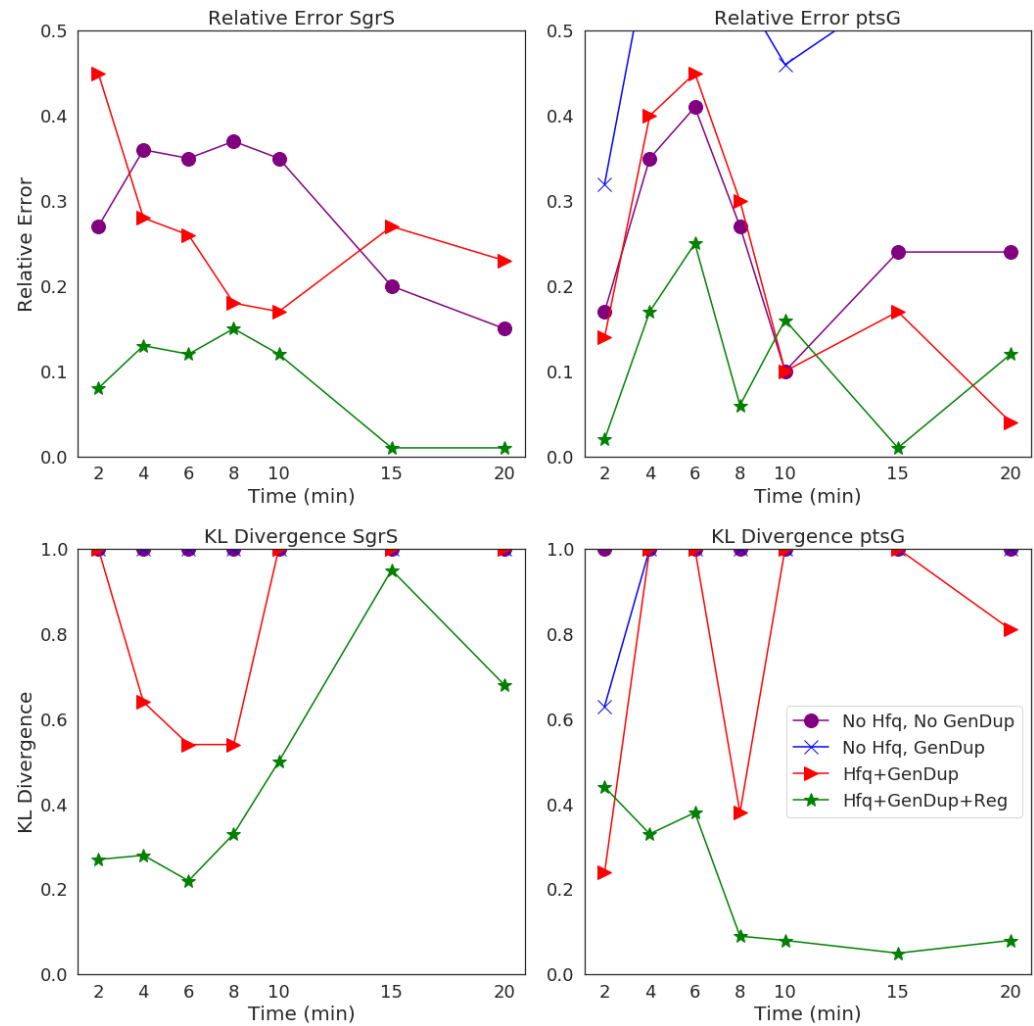

**Figure 7.** Statistical analysis of the agreement of sRNA and mRNA copy number between experiment and theory on both an average (Relative Error) and distribution (Kulback–Leibler: KL Divergence) level. KL Divergence values for the model with no Hfq stabilization nor Gene Duplication are not shown as the values obtained are at 1.0, corresponding to significant disagreement in that model variant and experiment. GeneDup refers to a model with Gene Duplication for both *SgrS* and *ptsG* implemented and Reg refers to a model with transcriptional regulation of *SgrS* by *SgrR* in place. The green line (with star markers) indicates the full kinetic model used for this study, which provides the best fit to both average and population level data for both *SgrS* and *ptsG* mRNA.

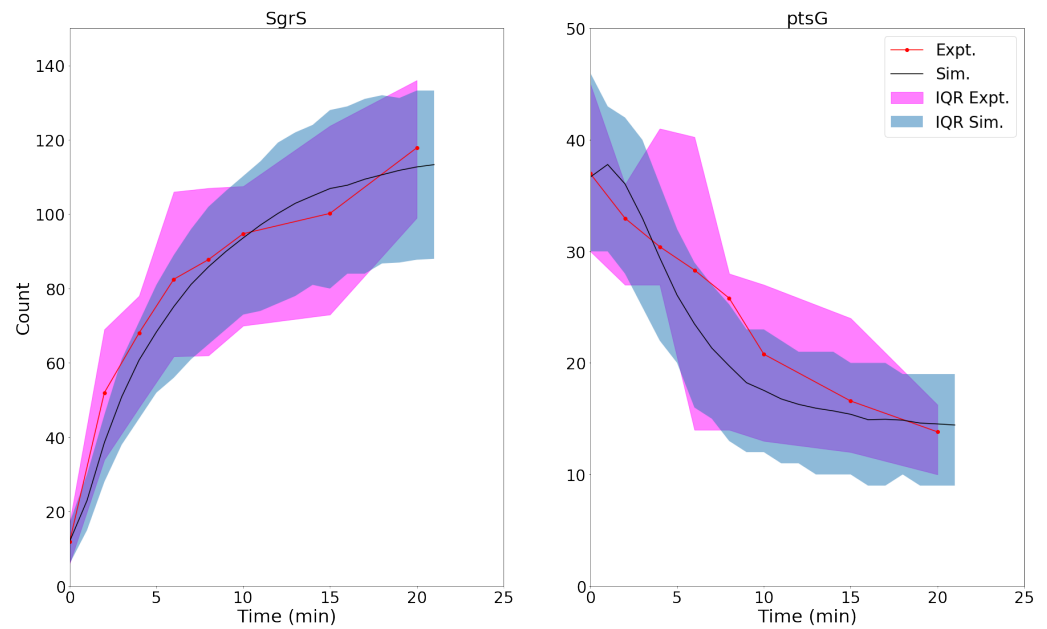

**Figure 8.** For U224G mutant cells, average time trace and interquartile range (IQR) of labeled *SgrS* (left) and *ptsG* mRNA (right) from both 85-169 cells from smFISH experiments (red) and 2000 replicates from kinetic model simulations (blue). The kinetic model shows strong agreement, especially at long times (10-20 minutes) after induction and captures overall response behavior. An available pool of 250 Hfq and the kinetic parameters given in [Table 1](#) were utilized, other than changes to *SgrS*-Hfq binding and unbinding rates and *ptsG* mRNA annealing and dissociation rates given in [Table 2](#).

292 previous conclusions that this is an important site for Hfq stabilization of *SgrS* ([Otaka et al., 2011](#)),  
293 and the regulatory efficiency of the network as a whole. The smaller relative changes in the *SgrS-ptsG*  
294 mRNA annealing rates  $k_{on}$  and  $k_{off}$  by 32% and 22% respectively may be due to altered interactions  
295 with Hfq that impair Hfq-dependent annealing of *SgrS* and *ptsG* mRNA (**Appendix 1 – Effects of**  
296 ***SgrS* Point Mutation on Regulatory Kinetics**). In light of the previously discussed slow *SgrS*-Hfq  
297 association process, it is reasonable that RNA restructuring of Hfq may be disrupted by mutation  
298 U224G, thus leading to slower and weaker annealing to *ptsG* mRNA. One possible explanation for  
299 the disturbance of regulation in mutant U224G is the disruption of orderly transcription termination  
300 (the polyU tail at the 3' end of *sgrS*). Such readthrough transcription has previously been ascribed to  
301 decrease the efficiency of *SgrS* binding to Hfq ([Morita et al., 2015, 2017](#)).

## 302 Discussion

303 The construction of a stochastic kinetic model including gene replication, transcriptional regulation,  
304 and the role of the Hfq chaperone protein demonstrates the utility of combining single cell experi-  
305 ments with stochastic modeling. The *SgrS* Regulatory Network is a noisy system characterized by  
306 small numbers of sRNA and mRNA, as well as gene copy numbers that vary from cell-to-cell. This  
307 leads to the population level heterogeneity that can then be used to parameterize a kinetic model  
308 for analysis of the role of specific molecular actors, such as the chaperone Hfq, and the effects of  
309 point mutation on sRNA silencing of mRNA.

310 The average number of Hfq hexamers present in an *E. coli* cell has been reported to be on  
311 the order of 1400 to 10000 (2  $\mu\text{M}$  - 15  $\mu\text{M}$ ) ([Santiago-Frangos and Woodson, 2018](#); [Taniguchi](#)  
312 [et al., 2010](#); [Wiśniewski and Rakus, 2014](#); [Mancuso et al., 2012](#); [Wang et al., 2015b](#)). It is worth  
313 noting that an extensive microfluidic-based, single-cell proteomics study that analyzed over 4000  
314 individual *E. coli* cells grown in similar media conditions as our study ([Taniguchi et al., 2010](#)) found  
315 a mean Hfq level of 1500. Additional immunoprecipitation and sequencing studies have shown the  
316 number of various individual mRNAs and sRNAs being bound to Hfq to range from 10s to 1000 in *E.*

**Table 2.** The list of kinetic parameters for SgrS-Hfq association ( $k_{bind}$  and  $k_{unbind}$ ) and annealing with *ptsG* mRNA ( $k_{on}$  and  $k_{off}$ ) for wild-type (WT) cells as well as SgrS mutant U224G (Reactions in **Figure 4**). The substantial decrease in the values of  $k_{bind}$  and  $k_{unbind}$  demonstrate the disruption of Hfq binding that accompanies the mutation in the polyU tail, which has been observed previously (*Otaka et al., 2011*). The smaller relative changes in the *ptsG* mRNA annealing rates may be due to disruption of RNA restructuring (*Antal et al., 2004; Bordeau and Felden, 2014; Soper et al., 2011; Soper and Woodson, 2008*) of SgrS by Hfq that hampers association to the mRNA target.

| Parameter    | Mutant | Value                                                  | % Difference from WT |
|--------------|--------|--------------------------------------------------------|----------------------|
| $k_{bind}$   | U224G  | $0.033 \text{ s}^{-1}$                                 | -48%                 |
|              | WT     | $0.063 \text{ s}^{-1}$                                 |                      |
| $k_{unbind}$ | U224G  | $0.003 \text{ s}^{-1}$                                 | +66%                 |
|              | WT     | $0.0018 \text{ s}^{-1}$                                |                      |
| $k_{on}$     | U224G  | $2.1 \times 10^{-4} \text{ molec}^{-1} \text{ s}^{-1}$ | -32%                 |
|              | WT     | $3.1 \times 10^{-4} \text{ molec}^{-1} \text{ s}^{-1}$ |                      |
| $k_{off}$    | U224G  | $0.27 \text{ s}^{-1}$                                  | +22%                 |
|              | WT     | $0.22 \text{ s}^{-1}$                                  |                      |

317 *coli* (*Melamed et al., 2020*). Thus, our prediction (from fitting) that a pool of approximately 250 Hfq  
 318 ( $0.5 \mu\text{M}$ ) are available to bind with SgrS sRNA at any time in the simulation of sugar shock regulation  
 319 seems reasonable.

320 In addition, our approach allowed us to characterize the rate of Hfq-SgrS association compared  
 321 to values for reported for Hfq stabilization of other regulatory sRNAs. If the pseudo first order Hfq  
 322 binding rate  $k_{bind}$  reported in **Table 1** is converted to a bulk second order rate we obtain a binding  
 323 rate of  $1.5 \times 10^5 \text{ M}^{-1} \text{ s}^{-1}$  which agrees reasonably well with the reported value (*Santiago-Frangos*  
 324 *and Woodson, 2018*) of approximately  $10^6 \text{ M}^{-1} \text{ s}^{-1}$  for long RNAs binding to Hfq (*Fender et al., 2010;*  
 325 *Lease and Woodson, 2004*) (compared to the value of  $10^8 \text{ M}^{-1} \text{ s}^{-1}$  for short, unstructured RNAs  
 326 binding to Hfq (*Hopkins et al., 2011*)). SgrS is a relatively long sRNA with a length of 227 nucleotides  
 327 (sRNAs have been observed with 37-300 nt (*Wang et al., 2015a*)), therefore the slow sRNA-Hfq  
 328 binding process that we describe does seem likely and could be due to RNA restructuring of  
 329 SgrS (*Maki et al., 2010; Antal et al., 2004; Bordeau and Felden, 2014; Soper et al., 2011; Soper and*  
 330 *Woodson, 2008*) by Hfq in order to promote binding with *ptsG* mRNA. It is thought that cellular sRNA  
 331 and mRNA are present in large excess over Hfq (*Wagner, 2013*), so nearly all cellular Hfq hexamers  
 332 are thought to be bound to RNA. Since cellular mRNA in *E. coli* are thought to be on the order  
 333 of approximately 2000-8000 copies (*Bartholomäus et al., 2016*) (much greater than the highest  
 334 measured SgrS sRNA value of 200) the available Hfq pool size that we present is representative of  
 335 the relative competitiveness (and time-dependent cycling) of SgrS for Hfq relative to its other RNA  
 336 targets.

337 The study of mutant U224G shows the importance of Hfq stabilization in the SgrS regulatory  
 338 network as a whole and seems to corroborate previous findings (*Otaka et al., 2011*) that highlight  
 339 the importance of the polyU tail for Hfq association with SgrS. The substantial decrease of the  
 340 Hfq-SgrS binding rate and increase in the related unbinding rate relative to the *ptsG* mRNA annealing  
 341 rates further down the network obtained from fitting confirms this point (**Table 2**). The changes  
 342 in the SgrS-*ptsG* mRNA annealing rates  $k_{on}$  and  $k_{off}$  seem to support conclusions from the wild-  
 343 type cells that Hfq-SgrS binding may result in some restructuring of the sRNA that makes this a  
 344 slow process. This may explain the lower efficiency in *ptsG* mRNA association observed in mutant  
 345 U224G, since Hfq cannot bind SgrS as effectively due to mutation at the polyU tail. Therefore,  
 346 the restructuring of SgrS by Hfq necessary to facilitate *ptsG* mRNA association is also hampered,  
 347 resulting in slower and less stable mRNA binding (a decrease in  $k_{on}$  and an increase in  $k_{off}$ ).

348 In conclusion, by incorporating gene replication, stabilization by the chaperone protein Hfq, and

349 transcriptional gene regulation of *sgrS* we have developed a kinetic model capable of describing the  
350 cellular heterogeneity observed in the *E. coli* sugar shock response network. Stochastic simulation  
351 of the kinetic model allows us to take full advantage of the single-molecule fluorescence data that  
352 illustrates cell-to-cell variability in a collection of hundreds of cells. While the post-transcriptional  
353 regulation and silencing of *ptsG* mRNA by the sRNA is the critical feature, accounting for gene  
354 replication, transcriptional regulation, and stabilization gives a more robust picture of the regulatory  
355 network as a whole. In addition, complexifying the model highlights the importance of stabilization  
356 by Hfq and chaperone proteins in general in RNA silencing networks and allowed for a prediction of  
357 the rate of association of SgrS and Hfq, the effective available Hfq pool size for the SgrS regulon  
358 under sugar stress conditions, as well as an analysis of an SgrS point mutation in one of the  
359 presumed Hfq binding modules (the polyU tail). The model presented in this work establishes a  
360 framework for models analyzing the other regulatory targets of SgrS along with spatially-resolved  
361 models describing SgrS target search kinetics.

## 362 **Methods and Materials**

363 Wild type *E. coli* cells (DJ480) were grown overnight at 37 °C, 250 rpm in LB Broth. The SgrS U224G  
364 mutant was grown in LB Broth with 50 µg/ml spectinomycin (Spec) (Sigma-Aldrich). The next day,  
365 overnight cultures were diluted 100-fold into MOPS EZ rich defined medium with 0.2% glucose  
366 and the cells were grown until  $OD_{600}$  reached 0.15–0.25.  $\alpha$ -methyl D-glucopyranoside ( $\alpha$ MG) (Sigma  
367 Aldrich) was then added to provoke glucose-phosphate stress and induce a SgrS expression re-  
368 sponse. Specific volumes of liquid were removed from the culture at 0, 2, 4, 6, 8, 10, 15, and 20  
369 minutes after induction and mixed with formaldehyde (Fisher Scientific) to a final concentration of  
370 4% for cell fixation prior to single molecule experiments.

371 Following fixation, the cells were incubated and washed, before being permeabilized with 70%  
372 ethanol, to allow for fluorescence *in situ* hybridization (FISH). Stellaris Probe Designer was used  
373 to design the smFISH oligonucleotide probes that were ordered from Biosearch Technologies  
374 (<https://www.biosearchtech.com/>). Each sRNA was labeled with 9 Alexa Fluor 647 probes while each  
375 *ptsG* mRNA was labeled with 28 CF 568 probes. The labeled RNA molecules were then imaged via the  
376 super-resolution technique STORM (Stochastic Optical Reconstruction Microscopy). A density-based  
377 clustering analysis algorithm (DBSCAN) (*Daszykowski et al., 2001*) was utilized to calculate RNA  
378 copy numbers. The algorithm used was the same as previously published (*Fei et al., 2015*), but  
379 the Nps and Eps values were updated for the SgrS and *ptsG* mRNA images, since CF 568 was used  
380 instead of Alexa Fluor 568 and a 405 nm laser to reactivate the dyes. The SgrS (9 probes labeled  
381 with AlexaFluor 647) images were clustered using  $Nps = 3$  and  $Eps = 15$  and the *ptsG* mRNA (28  
382 probes labeled with CF 568) images were clustered using  $Nps = 10$  and  $Eps = 25$  and these numbers  
383 were empirically chosen. A MATLAB code was used for cluster analysis.

384 The raw data was acquired using the Python-based acquisition software and it was analyzed  
385 using a data analysis algorithm which was based on work previously published by *Babcock et al.*  
386 (*2013*). The peak identification and fitting were performed using the method described previously.  
387 The z-stabilization was done by the CRISP system and the horizontal drift was calculated using Fast  
388 Fourier Transformation (FFT) on the reconstructed images of subsets of the super-resolution image,  
389 comparing the center of the transformed images and corrected using linear interpolation.

390 The *ptsG* mRNA degradation rates were calculated via a rifampicin-chase experiment. The wild  
391 type (DJ480) *E. coli* cells and  $\Delta hfq$  mutant strain SA1816 [DJ480, *lacIg, tetR, spec, \Delta hfq::kan*] cells  
392 were grown in LB Broth with the respective antibiotics at 37 °C, 250 rpm overnight. They were used  
393 to calculate the RNA degradation rates. The  $\Delta hfq::kan$  allele was moved to create strain SA1816  
394 constructed by P1 transduction (*Miller, 1972*). When the  $OD_{600}$  reached 0.15–0.25, rifampicin (Sigma-  
395 Aldrich) was added to cultures to a final concentration of 500 µg/ml. The cells were labeled by  
396 smFISH probes and analyzed by the same process described above, taking the time of rifampicin  
397 addition or  $\alpha$ MG removal as the 0 time point. Aliquots were taken after 0,2,4,6,8,10,15, and 20  
398 minutes (0,2,4,6, and 8 minutes for  $\Delta Hfq$  strains). For the purpose of background subtraction,  $\Delta SgrS$

399 and  $\Delta ptsG$  mRNA strains were grown, labeled with probes and imaged in the same manner to be  
400 used for the measurement of the background signal due to the non-specific binding of Alexa Fluor  
401 647 and CF 568. The natural logs of the RNA copy numbers were plotted against time and the slope  
402 of the linear fitting was used to calculate the RNA lifetime and then the degradation rates. SgrS  
403 degradation rates were obtained from *Fei et al. (2015)*, where they were measured by stopping  
404 the transcription of *sgrS* by removing  $\alpha$ MG from the media and then were imaged and analyzed to  
405 calculate the degradation rates in the same manner as was described for *ptsG* mRNA. The values for  
406  $k_{cat}$ ,  $k_{on}$ , and  $k_{off}$  for WT cells were confirmed to be within the errors reported for the values given  
407 in (*Fei et al., 2015*) by fitting to the experimentally measured RNA counts with the simplified model  
408 given in that work. The transcription rate of *ptsG* was determined using  $k_{i,p} = \beta_p \times [p]_0$ , (as described  
409 in *Fei et al. (2015)*), where  $[p]_0$  was the average initial level of *ptsG* mRNA before stress induction.  
410 The transcription rate obtained was unchanged between the wild-type and the U224G mutant cells.

## 411 Acknowledgements

412 This work was supported by grants from National Institutes of Health (NIGMS Grant R01 GM112659  
413 and R35 GM122569) and through the National Science Foundation Physics Frontiers Center: "The  
414 Center for the Physics of Living Cells" (CPLC) (NSF PHY 1430124).

## 415 Competing interests

416 The authors declare that no competing interests exist.

## 417 References

- 418 **Antal M**, Bordeau V, Douchin V, Felden B. A Small Bacterial RNA Regulates a Putative ABC Transporter. *Journal of Biological Chemistry*. 2004 Dec; 280(9):7901–7908. <https://doi.org/10.1074/jbc.m413071200>, doi: 10.1074/jbc.m413071200.
- 421 **Babcock HP**, Moffitt JR, Cao Y, Zhuang X. Fast compressed sensing analysis for super-resolution imaging using L1-homotopy. *Optics Express*. 2013 Nov; 21(23):28583. <https://doi.org/10.1364/oe.21.028583>, doi: 10.1364/oe.21.028583.
- 424 **Babski J**, Maier LK, Heyer R, Jaschinski K, Prasse D, Jäger D, Randau L, Schmitz RA, Marchfelder A, Soppa J. Small regulatory RNAs in Archaea. *RNA Biology*. 2014 May; 11(5):484–493. <https://doi.org/10.4161/rna.28452>, doi: 10.4161/rna.28452.
- 427 **Balasubramanian D**, Vanderpool CK. Deciphering the Interplay between Two Independent Functions of the Small RNA Regulator SgrS in Salmonella. *Journal of Bacteriology*. 2013 Aug; 195(20):4620–4630. <https://doi.org/10.1128/jb.00586-13>, doi: 10.1128/jb.00586-13.
- 430 **Bartholomäus A**, Fedyunin I, Feist P, Sin C, Zhang G, Valleriani A, Ignatova Z. Bacteria differently regulate mRNA abundance to specifically respond to various stresses. *Philosophical Transactions of the Royal Society A: Mathematical, Physical and Engineering Sciences*. 2016 Mar; 374(2063):20150069. <https://doi.org/10.1098/rsta.2015.0069>, doi: 10.1098/rsta.2015.0069.
- 434 **Bobrovskyy M**, Azam MS, Frandsen JK, Zhang J, Poddar A, Ma X, Henkin TM, Ha T, Vanderpool CK. Determinants of target prioritization and regulatory hierarchy for the bacterial small RNA SgrS. *Molecular Microbiology*. 2019 Aug; <https://doi.org/10.1111/mmi.14355>, doi: 10.1111/mmi.14355.
- 437 **Bobrovskyy M**, Vanderpool CK. The small RNA SgrS: roles in metabolism and pathogenesis of enteric bacteria. *Frontiers in Cellular and Infection Microbiology*. 2014 May; 4. <https://doi.org/10.3389/fcimb.2014.00061>, doi: 10.3389/fcimb.2014.00061.
- 440 **Bordeau V**, Felden B. Curli synthesis and biofilm formation in enteric bacteria are controlled by a dynamic small RNA module made up of a pseudoknot assisted by an RNA chaperone. *Nucleic Acids Research*. 2014 Jan; 42(7):4682–4696. <https://doi.org/10.1093/nar/gku098>, doi: 10.1093/nar/gku098.
- 443 **Cooper S**, Helmstetter CE. Chromosome replication and the division cycle of *Escherichia coli*. *Journal of Molecular Biology*. 1968 Feb; 31(3):519–540. doi: 10.1016/0022-2836(68)90425-7.



- 445 **Daszykowski M**, Walczak B, Massart D. Looking for natural patterns in data. *Chenom Intell Lab Syst.* 2001;  
446 56:83–92.
- 447 **Earnest TM**, Cole JA, Luthey-Schulten Z. Simulating Biological Processes: Stochastic Physics from Whole Cells to  
448 Colonies. *Rep Prog Phys.* 2018 apr; 81(5):052601. doi: 10.1088/1361-6633/aaae2c.
- 449 **Elowitz MB**, Levine AJ, Siggia ED, Swain PS. Stochastic Gene Expression in a Single Cell. *Science.* 2002 American  
450 Association for the Advancement of Science; 297(5584):1183–1186. doi: 10.1126/science.1070919.
- 451 **Fei J**, Singh D, Zhang Q, Park S, Balasubramanian D, Golding I, Vanderpool CK, Ha T. Determination of in  
452 vivo target search kinetics of regulatory noncoding RNA. *Science.* 2015 Mar; 347(6228):1371–1374. doi:  
453 10.1126/science.1258849.
- 454 **Fender A**, Elf J, Hampel K, Zimmermann B, Wagner EGH. RNAs actively cycle on the Sm-like protein Hfq. *Genes  
455 & Development.* 2010 Dec; 24(23):2621–2626. <https://doi.org/10.1101/gad.591310>, doi: 10.1101/gad.591310.
- 456 **Hallock MJ**, Stone JE, Roberts E, Fry C, Luthey-Schulten Z. Simulations of reaction diffusion processes over  
457 biologically-relevant size and time scales using multi-GPU workstations. *Parallel Comput.* 2014; 40:86–99. doi:  
458 10.1016/j.parco.2014.03.009.
- 459 **Hallock MJ**, Luthey-Schulten Z. Improving reaction kernel performance in Lattice Microbes: particle-wise  
460 propensities and run-time generated code. In: *Parallel and Distributed Processing Symposium Workshop  
461 (IPDPSW), 2016 IEEE International*; 2016. p. 428–343.
- 462 **Hopkins JF**, Panja S, Woodson SA. Rapid binding and release of Hfq from ternary complexes during RNA  
463 annealing. *Nucleic Acids Research.* 2011 Mar; 39(12):5193–5202. <https://doi.org/10.1093/nar/gkr062>, doi:  
464 10.1093/nar/gkr062.
- 465 **Ishikawa H**, Otaka H, Maki K, Morita T, Aiba H. The functional Hfq-binding molecule of bacterial sRNAs consists  
466 of a double or single hairpin preceded by a U-rich sequence and followed by a 3' poly(U) tail. *RNA.* 2012 May;  
467 18(5):1062–1074. doi: 10.1261/rna.031575.111.
- 468 **Jones DL**, Brewster RC, Phillips R. Promoter architecture dictates cell-to-cell variability in gene expression.  
469 *Science.* 2014 Dec; 346(6216):1533–1536. doi: 10.1126/science.1255301.
- 470 **Kawamoto H**, Koide Y, Morita T, Aiba H. Base-pairing requirement for RNA silencing by a bacterial small RNA  
471 and acceleration of duplex formation by Hfq. *Molecular Microbiology.* 2006 Aug; 61(4):1013–1022. doi:  
472 10.1111/j.1365-2958.2006.05288.x.
- 473 **Lease RA**, Woodson SA. Cycling of the Sm-like Protein Hfq on the DsrA Small Regulatory RNA. *Jour-  
474 nal of Molecular Biology.* 2004 Dec; 344(5):1211–1223. <https://doi.org/10.1016/j.jmb.2004.10.006>, doi:  
475 10.1016/j.jmb.2004.10.006.
- 476 **Lee SJ**. Signal transduction between a membrane-bound transporter, PtsG, and a soluble transcription factor,  
477 Mlc, of *Escherichia coli*. *The EMBO Journal.* 2000 Oct; 19(20):5353–5361. <https://doi.org/10.1093/emboj/19.20.5353>, doi:  
478 10.1093/emboj/19.20.5353.
- 479 **Maier T**, Schmidt A, Güell M, Kühner S, Gavin AC, Aebersold R, Serrano L. Quantification of mRNA and  
480 protein and integration with protein turnover in a bacterium. *Molecular Systems Biology.* 2011 Jan; 7(1):511.  
481 <https://doi.org/10.1038/msb.2011.38>, doi: 10.1038/msb.2011.38.
- 482 **Maki K**, Morita T, Otaka H, Aiba H. A minimal base-pairing region of a bacterial small RNA SgrS required for  
483 translational repression of ptsG mRNA. *Molecular Microbiology.* 2010 Mar; 76(3):782–792. doi: 10.1111/j.1365-  
484 2958.2010.07141.x.
- 485 **Mancuso F**, Bunkenborg J, Wierer M, Molina H. Data extraction from proteomics raw data: An evaluation of  
486 nine tandem MS tools using a large Orbitrap data set. *Journal of Proteomics.* 2012 Sep; 75(17):5293–5303.  
487 <https://doi.org/10.1016/j.jprot.2012.06.012>, doi: 10.1016/j.jprot.2012.06.012.
- 488 **Melamed S**, Adams PP, Zhang A, Zhang H, Storz G. RNA-RNA Interactomes of ProQ and Hfq Reveal Overlapping  
489 and Competing Roles. *Molecular Cell.* 2020 Jan; 77(2):411–425.e7. <https://doi.org/10.1016/j.molcel.2019.10.022>, doi:  
490 10.1016/j.molcel.2019.10.022.
- 491 **Miller JH**. *Experiments in Molecular Genetics.* xvi ed. Cold Spring Harbor Laboratory, Cold Spring Harbor, N.Y.:  
492 Cold Spring Harbor Laboratory; 1972.

- 493 **Morita T**, Ueda M, Kubo K, Aiba H. Insights into transcription termination of Hfq-binding sRNAs of *Escherichia*  
494 *coli* and characterization of readthrough products. *RNA*. 2015 Jun; 21(8):1490–1501. [https://doi.org/10.1261/](https://doi.org/10.1261/rna.051870.115)  
495 [rna.051870.115](https://doi.org/10.1261/rna.051870.115), doi: 10.1261/rna.051870.115.
- 496 **Morita T**, Nishino R, Aiba H. Role of the terminator hairpin in the biogenesis of functional Hfq-binding sRNAs.  
497 *RNA*. 2017 Jun; 23(9):1419–1431. <https://doi.org/10.1261/rna.060756.117>, doi: 10.1261/rna.060756.117.
- 498 **Nam TW**, Jung HI, An YJ, Park YH, Lee SH, Seok YJ, Cha SS. Analyses of Mlc-IIBGlc interaction and a plau-  
499 sible molecular mechanism of Mlc inactivation by membrane sequestration. *Proceedings of the Na-*  
500 *tional Academy of Sciences*. 2008 Mar; 105(10):3751–3756. <https://doi.org/10.1073/pnas.0709295105>, doi:  
501 [10.1073/pnas.0709295105](https://doi.org/10.1073/pnas.0709295105).
- 502 **Otaka H**, Ishikawa H, Morita T, Aiba H. PolyU tail of rho-independent terminator of bacterial small RNAs is  
503 essential for Hfq action. *Proceedings of the National Academy of Sciences*. 2011 Jul; 108(32):13059–13064.  
504 <https://doi.org/10.1073/pnas.1107050108>, doi: 10.1073/pnas.1107050108.
- 505 **Peterson JR**, Hallock MJ, Cole JA, Luthey-Schulten ZA. A Problem Solving Environment for Stochastic Biological  
506 Simulations. In: *PyHPC 2013 Supercomputing 2013*; 2013. doi: 10.13140/2.1.3207.7440.
- 507 **Peterson JR**, Cole JA, Fei J, Ha T, Luthey-Schulten ZA. Effects of DNA replication on mRNA noise. *PNAS*. 2015  
508 Dec; 112(52):15886–15891. doi: 10.1073/pnas.1516246112.
- 509 **Raser JM**. Noise in Gene Expression: Origins, Consequences, and Control. *Science*. 2005 sep; 309(5743):2010–  
510 2013. doi: 10.1126/science.1105891.
- 511 **Roberts E**, Stone JE, Luthey-Schulten Z. Lattice Microbes: high-performance stochastic simulation method for the  
512 reaction-diffusion master equation. *J Comp Chem*. 2013; 3:245–255. doi: 10.1002/jcc.23130.
- 513 **Santiago-Frangos A**, Woodson SA. Hfq chaperone brings speed dating to bacterial sRNA. *Wiley Interdisciplinary*  
514 *Reviews: RNA*. 2018 Apr; 9(4):e1475. <https://doi.org/10.1002/wrna.1475>, doi: 10.1002/wrna.1475.
- 515 **Seitz S**, Lee SJ, Pannetier C, Boos W, Plumbridge J. Analysis of the Interaction between the Global Regulator Mlc  
516 and EII<sub>B</sub>Glc of the Glucose-specific Phosphotransferase System in *Escherichia coli*. *Journal of Biological Chem-*  
517 *istry*. 2003 Jan; 278(12):10744–10751. <https://doi.org/10.1074/jbc.m212066200>, doi: 10.1074/jbc.m212066200.
- 518 **Soper TJ**, Doxzen K, Woodson SA. Major role for mRNA binding and restructuring in sRNA recruitment by Hfq.  
519 *RNA*. 2011 Jun; 17(8):1544–1550. <https://doi.org/10.1261/rna.2767211>, doi: 10.1261/rna.2767211.
- 520 **Soper TJ**, Woodson SA. The rpoS mRNA leader recruits Hfq to facilitate annealing with DsrA sRNA. *RNA*. 2008  
521 Jul; 14(9):1907–1917. <https://doi.org/10.1261/rna.1110608>, doi: 10.1261/rna.1110608.
- 522 **Taniguchi Y**, Choi PJ, Li GW, Chen H, Babu M, Hearn J, Emili A, Xie XS. Quantifying *E. coli* Proteome and  
523 Transcriptome with Single-Molecule Sensitivity in Single Cells. *Science*. 2010 Jul; 329(5991):533–538. <https://doi.org/10.1126/science.1188308>, doi:  
524 [10.1126/science.1188308](https://doi.org/10.1126/science.1188308).
- 525 **Vanderpool CK**, Gottesman S. The Novel Transcription Factor SgrR Coordinates the Response to Glucose-  
526 Phosphate Stress. *Journal of Bacteriology*. 2007 Jan; 189(6):2238–2248. <https://doi.org/10.1128/jb.01689-06>,  
527 doi: 10.1128/jb.01689-06.
- 528 **Vanderpool CK**, Gottesman S. The Novel Transcription Factor SgrR Coordinates the Response to Glucose-  
529 Phosphate Stress. *Journal of Bacteriology*. 2007 Jan; 189(6):2238–2248. doi: 10.1128/jb.01689-06.
- 530 **Vanderpool CK**, Gottesman S. Involvement of a novel transcriptional activator and small RNA in post-  
531 transcriptional regulation of the glucose phosphoenolpyruvate phosphotransferase system. *Molecular*  
532 *Microbiology*. 2004 Oct; 54(4):1076–1089. doi: 10.1111/j.1365-2958.2004.04348.x.
- 533 **Wagner EGH**. Cycling of RNAs on Hfq. *RNA Biology*. 2013 Apr; 10(4):619–626. <https://doi.org/10.4161/rna.24044>,  
534 doi: 10.4161/rna.24044.
- 535 **Wang J**, Liu T, Zhao B, Lu Q, Wang Z, Cao Y, Li W. sRNATarBase 3.0: an updated database for sRNA-target  
536 interactions in bacteria. *Nucleic Acids Research*. 2015 Oct; 44(D1):D248–D253. [https://doi.org/10.1093/nar/](https://doi.org/10.1093/nar/gkv1127)  
537 [gkv1127](https://doi.org/10.1093/nar/gkv1127), doi: 10.1093/nar/gkv1127.
- 538 **Wang M**, Zhang J, Xu H, Golding I. Measuring transcription at a single gene copy reveals hidden drivers  
539 of bacterial individuality. *Nature Microbiology*. 2019 Sep; <https://doi.org/10.1038/s41564-019-0553-z>, doi:  
540 [10.1038/s41564-019-0553-z](https://doi.org/10.1038/s41564-019-0553-z).

- 541 **Wang M**, Herrmann CJ, Simonovic M, Szklarczyk D, von Mering C. Version 4.0 of PaxDb: Protein abundance  
542 data, integrated across model organisms, tissues, and cell-lines. *PROTEOMICS*. 2015 Mar; 15(18):3163–3168.  
543 <https://doi.org/10.1002/pmic.201400441>, doi: 10.1002/pmic.201400441.
- 544 **Wiśniewski JR**, Rakus D. Quantitative analysis of the Escherichia coli proteome. *Data in Brief*. 2014 Dec; 1:7–11.  
545 <https://doi.org/10.1016/j.dib.2014.08.004>, doi: 10.1016/j.dib.2014.08.004.
- 546 **Youngren B**, Nielsen HJ, Jun S, Austin S. The multifork Escherichia coli chromosome is a self-duplicating  
547 and self-segregating thermodynamic ring polymer. *Genes & Development*. 2014 Jan; 28(1):71–84. doi:  
548 [10.1101/gad.231050.113](https://doi.org/10.1101/gad.231050.113).
- 549 **Zuker M**. Mfold web server for nucleic acid folding and hybridization prediction. *Nucleic Acids Research*. 2003  
550 Jul; 31(13):3406–3415. <https://doi.org/10.1093/nar/gkg595>, doi: 10.1093/nar/gkg595.

## 551 Appendix 1

### 552 Effects of Varying Available Hfq Pool Size

553 The available pool of Hfq utilized in the model represents the fraction of cellular Hfq hex-  
554 amers bound to SgrS as opposed to other targets and thus the relative binding strength of  
555 SgrS compared to other RNAs stabilized by the chaperone. Previous work (*Melamed et al.,*  
556 *2020*) has shown that the typical number of Hfq bound to a given sRNA varies widely across  
557 sRNA species. If an even smaller pool of cellular Hfq is assumed to be available for SgrS  
558 binding under sugar shock conditions the average behavior of SgrS experimentally observed  
559 can be more exactly captured (**Appendix 1-Figure 1**). However, this comes at a loss of the  
560 population level noise observed in the measured RNA distributions because fewer SgrS can  
561 be stabilized and so it decays on a much faster timescale, resulting in a loss of cell-to-cell  
562 variation. When additional Hfq is added to the available pool such as the 800 available in  
563 the simulations shown in **Appendix 1-Figure 1** the opposite behavior can be seen. SgrS  
564 exhibits greater population level heterogeneity, but with a less robust fit to the average  
565 behavior that is experimentally observed. We propose that this creates more noise because  
566 SgrS is less likely to be present in its free form and decays more slowly when it is associated  
567 with *ptsG* mRNA and Hfq ( $k_{on}$  is small relative to  $k_{d,s}$ ) than it would when it is not stabilized by  
568 Hfq (*Figure 4, rxn 2.2* versus rxn 4 followed by rxn 5).

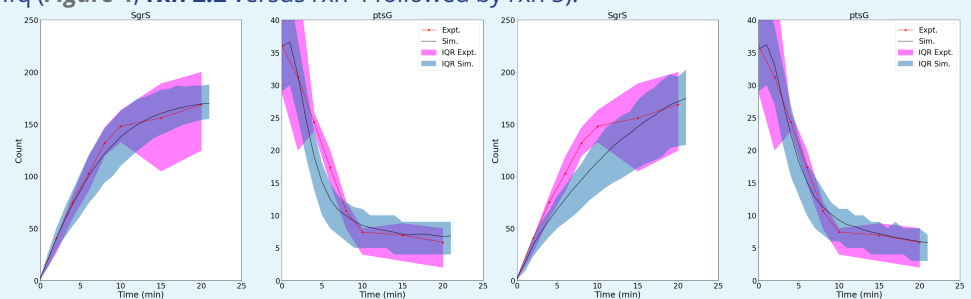

569 **Appendix 1 Figure 1. Left:** Trace and interquartile range (IQR) of SgrS sRNA and *ptsG* mRNA mRNA  
570 where simulations include a smaller pool of 200 Hfq available (versus 250 in main text simulations).  
571 While averages can be more tightly fit, the population level variation observed for SgrS is minimized  
572 even further from what is observed experimentally, including at long times post-induction. **Right:** A  
573 similar plot of Trace and IQR with Hfq available pool size equal to 800. Here the population level  
574 variation is larger (especially at long times post induction), but the initial average traces are less well  
575 captured.  
576

578

## Effects of Initial Gene State

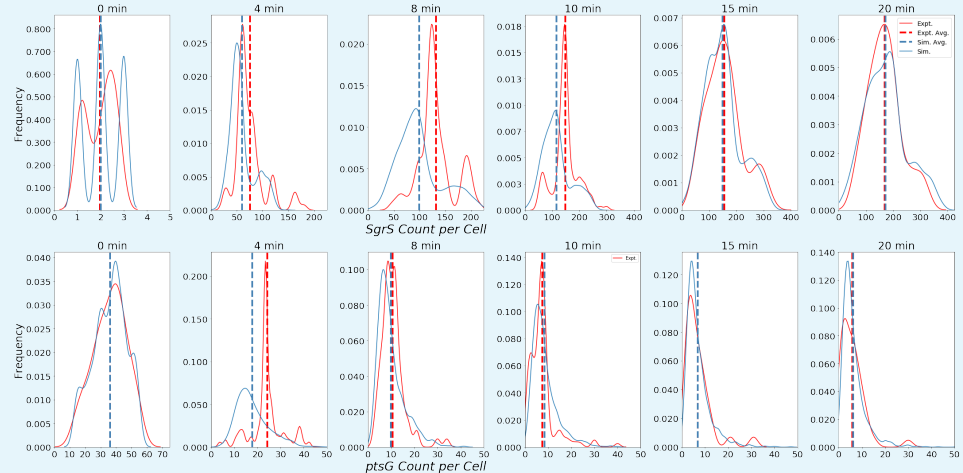

579

580

581

582

583

**Appendix 1 Figure 2.** Distributions of Wild-Type SgrS (top) and *ptsG* mRNA (bottom) at various time points from 0 to 20 minutes post-induction. Data from smFISH-STORM experiments (red, 100-200 cells per time point) and stochastic simulations (blue, 2000 cells per time point) are shown as kernel density estimates. Average copy number at each time point is displayed with dashed vertical lines.

585

586

587

588

589

590

591

592

593

594

595

596

597

598

599

600

601

602

Of interest from a more technical standpoint, is the state of the *sgrS* genes at time = 0 minutes in the simulation. While, in principle these genes should be in the “OFF” state and unable to be transcribed since induction has yet to begin it is interesting to understand the effects of initial gene state on population level noise. Consider the following example, when all SgrS genes begin in “ON” state. While the average behavior a times from 4 to 10 minutes is poorly captured, the RNA distributions are well-described at 15 and 20 minutes post-induction (**Appendix 1-Figure 2**). This model assumes an immediate switch of the *sgrS* genes due to induction. While unrealistic when taken at face value, it is reasonable to assume the induction occurs on the order of seconds, since the amount of SgrS increases by a factor of 10 from its basal value by 2 minutes post-induction (**Figure 5**) and since binding of the SgrR activator for *sgrS* is mediated by binding to a small molecule (*i.e.* glucose-6 phosphate), which presumably takes some interval of time. The smaller  $k_{on,Ds}$  and  $k_{off,Ds}$  values ( $2.0 \times 10^{-3} s^{-1}$  and  $6.5 \times 10^{-4} s^{-1}$  versus  $3.0 \times 10^{-2} s^{-1}$  and  $9.5 \times 10^{-3} s^{-1}$ , respectively) used in **Figure 4** Rxn 2.0 relative to those given in **Table 1** then lead to a wider range of population distributions at late times due to longer dwell times (*i.e.* up to 5 minutes) for the *sgrS* gene in the “OFF” state compared to the a typical dwell time of less than 1 minute in the “OFF” state when the more appropriate regulatory values ( $3.0 \times 10^{-2} s^{-1}$  and  $9.5 \times 10^{-3} s^{-1}$ ) are used for  $k_{on,Ds}$  and  $k_{off,Ds}$  respectively.

603

## Effects of Increased Cell Replicate Number

604

605

606

607

608

The number of *E. coli* cells that are simulated or have their RNA distributions experimentally measured is of great importance when considering a process characterized by stochasticity. A certain number of cells must be observed to accurately capture both the average behavior and cell-to-cell variability that emanates from a kinetic regulatory system (**Taniguchi et al., 2010; Elowitz et al., 2002; Raser, 2005**).

**Appendix 1-Figure 3** shows the effect of number of cells measured on the average and standard deviation of the SgrS simulated at 20 minutes post-induction. The bootstrapping technique presented allows for the selection of an individual *E. coli* cellular replicate with replacement up to N cells. The vertical dashed line in each figure shows the expected average and standard deviation values produced from bootstrapping with N=85, the number of cells

experimentally measured at time 20 minutes post-induction. This highlights the possible error in both mean copy number (5-10 copies) or population level variation (5-10 copies) that could be accrued due to insufficient sampling.

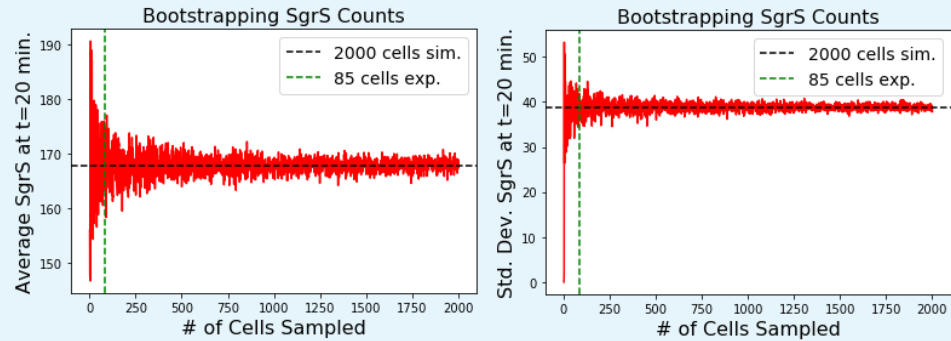

**Appendix 1 Figure 3.** Bootstrapping of SgrS sRNA simulated at 20 minutes post sugar shock induction. The x axis gives the number of samples taken (N) with replacement out of a total 2000 independent simulation trajectories in the bootstrapping procedure. The vertical dashed line at N=85 shows the number of cells experimentally imaged at this time point. It takes thousands of simulated cells before the SgrS mean and population level variation noise begin to relax to the calculated values.

### Effects of SgrS Point Mutation On Regulatory Kinetics

In order to fit to mutant U224G the same parameters were utilized other than the SgrS-*ptsG* mRNA binding and unbinding rates  $k_{bind}$  and  $k_{unbind}$  and the *ptsG* mRNA association rates  $k_{on}$  and  $k_{off}$ . The same gene state (high versus low gene copy number) percentages for *sgrS* and *ptsG* as for the wild-type cells were used as well as the same "available" Hfq pool size of 250 hexamers. The distributions (as kernel density estimates) shown in **Appendix 1-Figure 4** for both SgrS and *ptsG* mRNA were obtained via the fitting process.

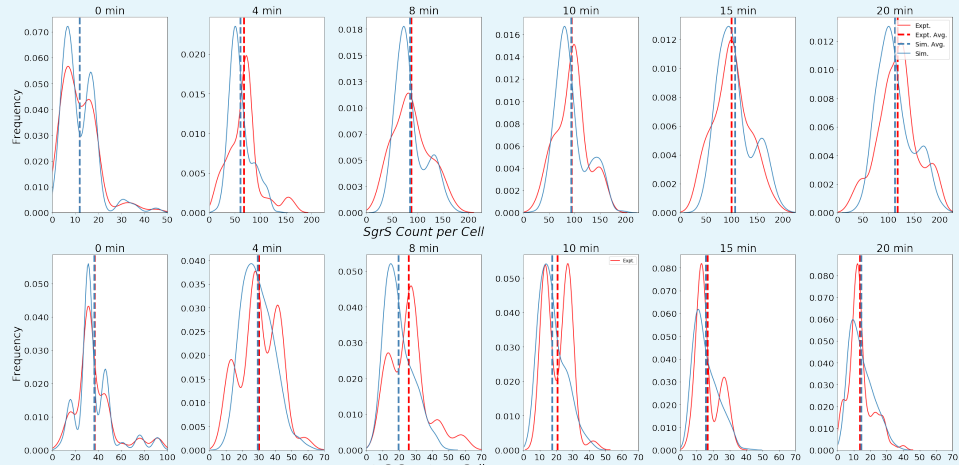

**Appendix 1 Figure 4.** Distributions of polyU tail mutant U224G for SgrS (top) and *ptsG* mRNA (bottom) at various time points from 0 to 20 minutes post-induction. Data from smFISH-STORM experiments (red, 100-200 cells per time point) and stochastic simulations (blue, 2000 cells per time point) are shown as kernel density estimates. Average copy number at each time point is displayed with dashed vertical lines.

In order to attempt focus on a point mutation that primarily showed a disruption in SgrS-Hfq association we sought a mutant in which SgrS secondary structure would not be significantly disrupted, leading to a higher free degradation rate of SgrS. Via *in silico* folding using the RNA structure prediction tool mFold (Zuker, 2003), we confirmed that the stability



of the U224G with a  $\Delta G$  of  $-17.60 \text{ kcal/mol}$  is unchanged from the predicted wild-type value of  $-17.60 \text{ kcal/mol}$ , indicating that sRNA structure is conserved. The predicted U224G mutant structure also shows similar shape to that of the wild-type (**Appendix 1-Figure 5**) and does not show any additional stem loop formation as did other mutants. Thus, an assumption that the measured wild-type  $\Delta H_{fq}$  degradation rate (see Section 'Methods and Materials') is appropriate for use in fitting the U224G mutant data is reasonable.

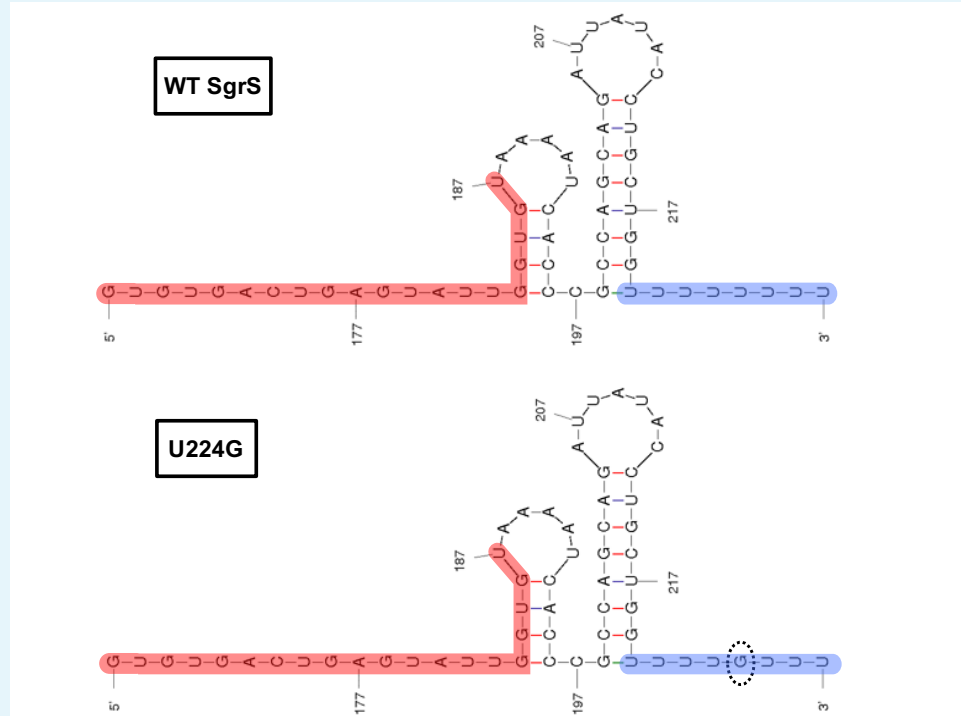

**Appendix 1 Figure 5.** Flattened predicted sRNA structures for wild-type (WT) SgrS (left) as well as the U224G mutant (right) studied in this work obtained via mFold *in silico* folding. **Red:** the SgrS-*ptsG* mRNA basepairing region, **Blue:** the polyU tail, with the mutated residue circled in the U224G structure. The predicted structures show similar conformation as well as identical free energies ( $-17.60 \text{ kcal/mol}$ ), indicating that SgrS secondary structure is likely not significantly destabilized by the U224G point mutation in the polyU tail.
